# Supplementary material for: Efficacy of Newer Molecules, Bioagents and Botanicals against Maydis Leaf Blight and Banded Leaf and Sheath Blight of Maize
Source: PubMed Central journal article supplement — Plant Pathol J. 2018 Apr 1;34(2):121–5. doi: 10.5423/PPJ.OA.11.2017.0251 (PMC5880356; doi:10.5423/ppj.oa.11.2017.0251), 2018-04-01
Supplement: ppj-34-121_suppl.pdf [file ppj-34-121_suppl.pdf]

**Supplementary Table 1.** Efficacy of fungicides on incidence of maydis leaf blight under field condition during *kharif* 2014 and 2015

| Treatment                                   | Kharif 2014  |                   |               | Kharif 2015   |                   |               |
|---------------------------------------------|--------------|-------------------|---------------|---------------|-------------------|---------------|
|                                             | PDI          | % Disease control | Yield (kg/ha) | PDI           | % Disease control | Yield (kg/ha) |
| Propiconazole @ 0.1 %                       | 50.56(45.30) | 39.33             | 775.0         | 50.00 (44.90) | 37.50             | 770.0         |
| Hexaconazole @ 0.1%                         | 52.22(46.28) | 37.33             | 748.0         | 52.89 (46.63) | 33.88             | 690.0         |
| Carbendazim @ 0.1%                          | 51.11(45.62) | 38.67             | 760.0         | 51.81 (46.02) | 35.25             | 730.0         |
| Mancozeb @ 0.2%                             | 52.78(46.58) | 36.67             | 760.0         | 53.30 (46.90) | 33.37             | 690.0         |
| Carbendazim 12 WP + Mancozeb 63 WP @ 0.125% | 49.44(44.66) | 40.67             | 787.0         | 50.55 (45.23) | 36.81             | 760.0         |
| Untreated check (water spray)               | 83.33(65.90) | 0.00              | 569.0         | 80.00 (63.92) | 0.00              | 580.0         |
| Sem+                                        | 0.85         |                   | 0.09          | 0.80          |                   | 0.08          |
| CD 0.05                                     | (2.72)       |                   | 40.0          | (2.78)        |                   | 44.0          |
| CV %                                        | 3.02         |                   | 5.28          | 3.12          |                   | 5.75          |

\*Statistically data analysis (CD, CV & Sem) with transformed values in parenthesis, PDI = per cent disease index

**Supplementary Table 2.** Efficacy of botanicals/bioagents on incidence of maydis leaf blight under field condition during *kharif* 2014 and 2015

| Treatment                                                                      | Kharif 2014  |                   |               | Kharif 2015  |                   |               |
|--------------------------------------------------------------------------------|--------------|-------------------|---------------|--------------|-------------------|---------------|
|                                                                                | PDI          | % Disease control | Yield (kg/ha) | PDI          | % Disease control | Yield (kg/ha) |
| Azadirachtin 3000ppm @ 0.3%                                                    | 69.44(56.45) | 15.54             | 767.0         | 67.00(54.94) | 14.97             | 600.0         |
| <i>R. serpentine</i> leaves (Sarpagandha) @10%                                 | 52.78(46.58) | 35.81             | 808.0         | 52.22(46.28) | 23.73             | 788.0         |
| <i>A. marmelos</i> leaves (Bel Pathar) @ 25 %                                  | 63.89(53.06) | 22.30             | 621.0         | 63.33(52.85) | 19.63             | 624.0         |
| TH-3 @ 0.5% as seed treatment, bioagents-fortified FYM (1:50) and spray @ 0.5% | 63.33(52.71) | 22.97             | 554.0         | 58.89(50.11) | 25.26             | 660.0         |
| TV-3 @ 0.5% as seed treatment, bioagents-fortified FYM (1:50) and spray@ 0.5%  | 58.89(50.11) | 28.38             | 528.0         | 56.66(48.84) | 28.09             | 612.0         |
| Untreated check (water spray)                                                  | 82.22(65.08) | 0.00              | 497.0         | 78.80(62.58) | 0.00              | 490.0         |
| Sem+                                                                           | 1.30         |                   | 0.06          | 1.25         |                   | 0.06          |
| CD 0.05                                                                        | (4.13)       |                   | 29.0          | (4.23)       |                   | 27.0          |
| CV %                                                                           | 4.16         |                   | 4.96          | 4.36         |                   | 5.12          |

\*Statistically data analysis (CD, CV & Sem) with transformed values in parenthesis, PDI = per cent disease index

**Supplementary Table 3.** Efficacy of newer fungicides on incidence of banded leaf and sheath blight under field condition during *kharif* 2014 and 2015

| Treatment                                      | <i>Kharif</i> 2014 |                   |               | <i>Kharif</i> 2015 |                   |               |
|------------------------------------------------|--------------------|-------------------|---------------|--------------------|-------------------|---------------|
|                                                | PDI                | % Disease control | Yield (kg/ha) | PDI                | % Disease control | Yield (kg/ha) |
| Difenconazole @ 0.1 %                          | 53.33(46.89)       | 40.00             | 4242.0        | 40.35(39.41)       | 42.60             | 4342.0        |
| Hexaconazole @ 0.1%                            | 54.00(47.28)       | 39.25             | 4536.0        | 44.00(41.55)       | 37.41             | 4438.0        |
| Carbendazim @ 0.1%                             | 52.89(46.63)       | 40.50             | 4034.0        | 42.80(40.86)       | 39.11             | 4045.0        |
| Validamycin @ 0.1%                             | 47.55(43.56)       | 46.50             | 4742.0        | 35.50(36.57)       | 49.15             | 4648.0        |
| Tebuconazole @ 0.05%                           | 51.81(46.02)       | 41.71             | 4192.0        | 40.20(39.35)       | 42.81             | 4242.0        |
| Trifloxystrobin 25% + Tebuconazole 50% @ 0.05% | 50.44(45.24)       | 43.25             | 4344.0        | 39.30(38.82)       | 44.09             | 4344.0        |
| Azoxystrobin @ 0.05%                           | 53.33(46.89)       | 40.00             | 4101.0        | 40.32(39.41)       | 42.64             | 4134.0        |
| Pencycuron @ 0.1%                              | 50.55(45.23)       | 43.13             | 4150.0        | 50.00(44.09)       | 38.87             | 3950.0        |
| Untreated check (water spray)                  | 88.89(71.07)       | 0.00              | 3200.0        | 70.30(56.98)       | 0.00              | 3320.0        |
| Sem+                                           | 1.52               |                   | 0.50          | 1.48               |                   | 0.67          |
| CD 0.05                                        | (4.59)             |                   | 152.0         | (4.72)             |                   | 168.0         |
| CV %                                           | 5.39               |                   | 5.20          | 5.54               |                   | 5.46          |

\* Statistically data analysis (CD, CV & Sem) with transformed values in parenthesis, PDI = per cent disease index
